# Supplementary material
Source: ML conference proceedings conference paper supplement (https://proceedings.mlr.press/v70/lyu17a.html)
Supplement: Supplementary file [file lyu17a-supp.pdf]

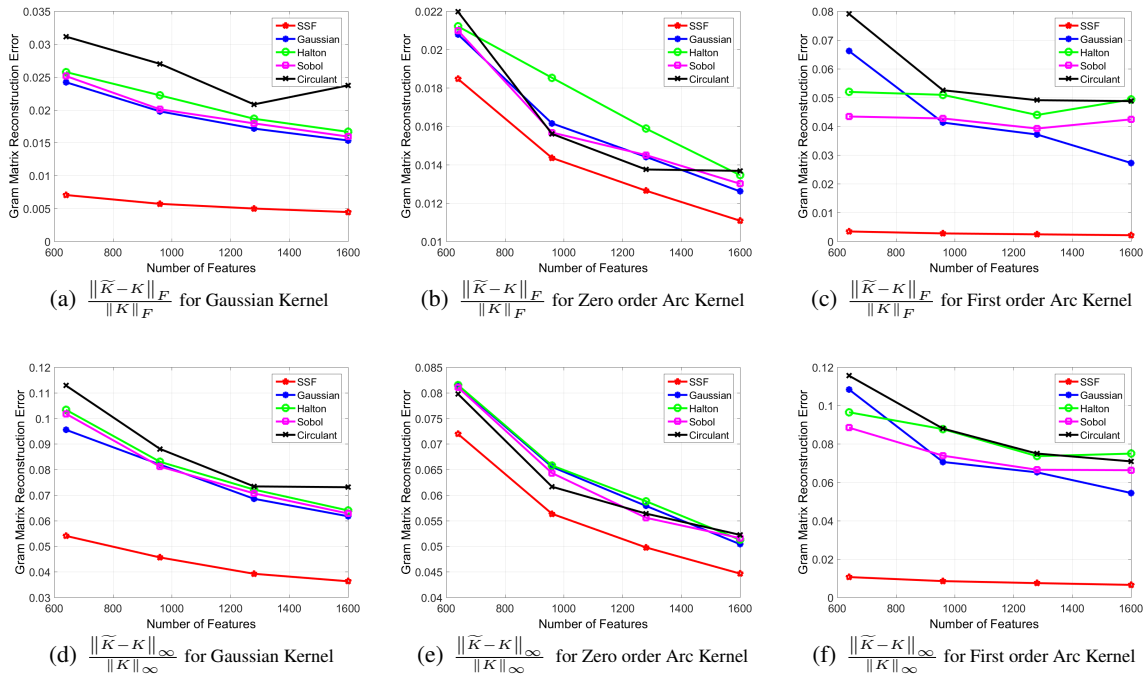

Figure 1. Relative Mean and Max Reconstruction Error for Gaussian, Zero-order and First-order Arc-cosine Kernel on CIFAR10

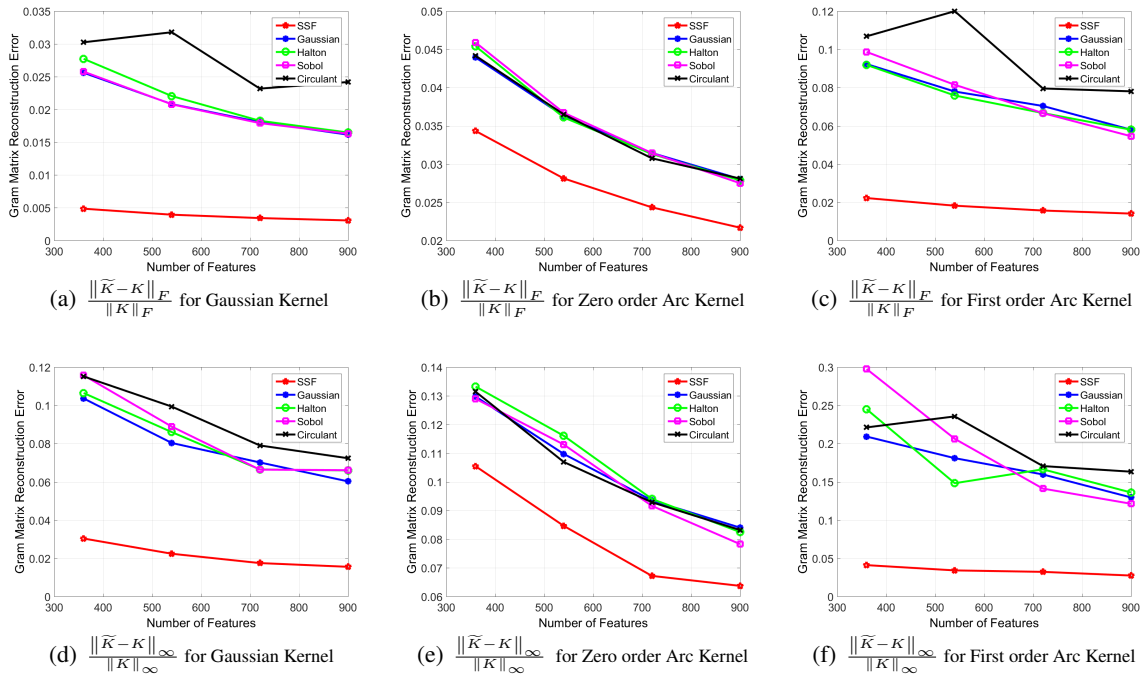

Figure 2. Relative Mean and Max Reconstruction Error for Gaussian, Zero-order and First-order Arc-cosine Kernel on dna

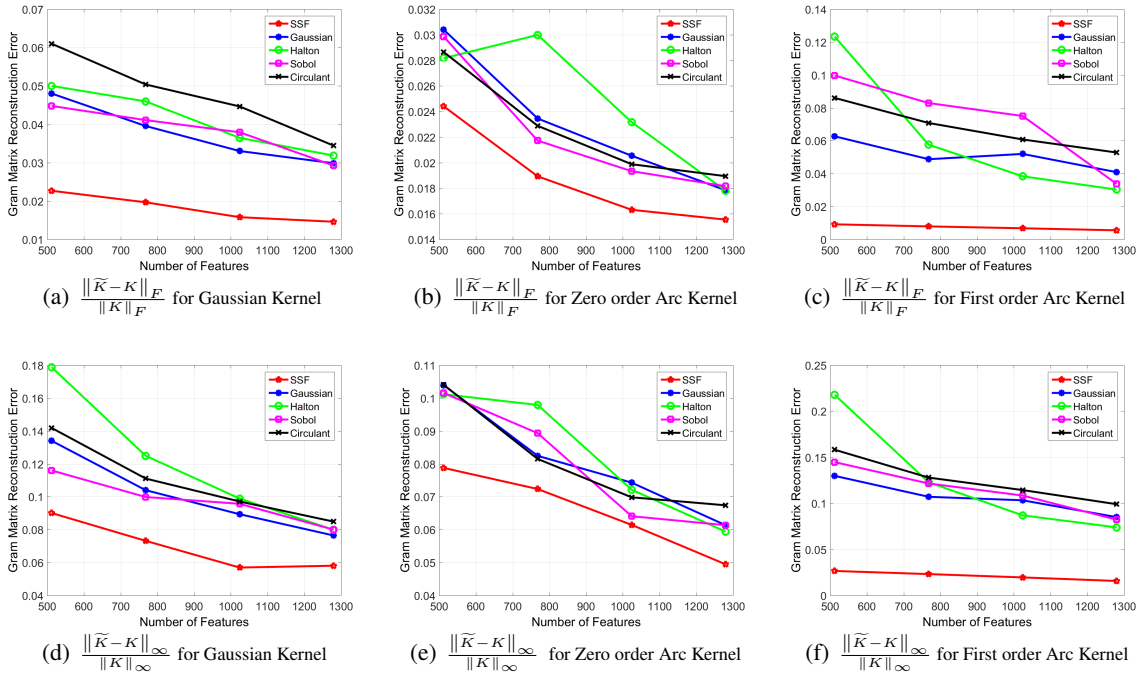

Figure 3. Relative Mean and Max Reconstruction Error for Gaussian, Zero-order and First-order Arc-cosine Kernel on uspst

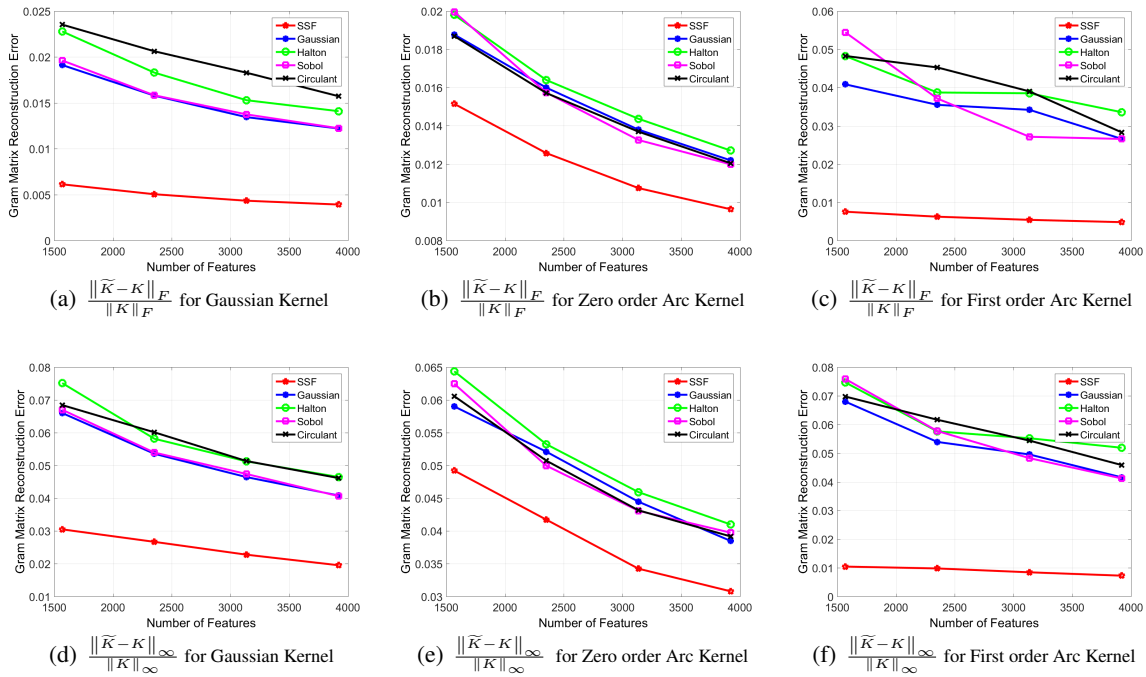

Figure 4. Relative Mean and Max Reconstruction Error for Gaussian, zero and first order arc-cosine Kernel on MNIST
